# Supplementary material
Source: PubMed Central journal article supplement (PMC4461536)
Supplement: NIHMS689999-supplement-1.pdf [file NIHMS689999-supplement-1.pdf]

Supplementary Table 1. Primers used for real-time PCR analyses

| <b>Gene</b> |         | <b>Primer</b>                  |
|-------------|---------|--------------------------------|
| mCcmd1      | Forward | 5'-GCGTACCCTGACACCAATCT-3'     |
|             | Reverse | 5'-ATCTCCTTCTGCACGCACTT-3'     |
| mCcmd2      | Forward | 5'-TCGATGATTGCAACTGGAAG-3'     |
|             | Reverse | 5'-AGAGCTTCGATTTGCTCCTG-3'     |
| mE2f3       | Forward | 5'-TCTAAAGACCCCAAGGGCA-3'      |
|             | Reverse | 5'-GATCCAGGACCCCATCAGGA-3'     |
| mRbl1       | Forward | 5'-CCCGGAGCCGAAAACAGAG-3'      |
|             | Reverse | 5'-ACCAATCATACGGAAATCCCC-3'    |
| mCcnb2      | Forward | 5'-TGTCACAAGCAGCCGAAAC-3'      |
|             | Reverse | 5'-TCAGAGAAAGCTTGGCAGAGG-3'    |
| mCdk1       | Forward | 5'-AGAAGGTACTTACGGTGTGGT-3'    |
|             | Reverse | 5'-GAGAGATTTCCCGAATTGCAGT-3'   |
| mChek1      | Forward | 5'-GTTAAGCCACGAGAATGTAGTGA-3'  |
|             | Reverse | 5'-TTCAGGCATCCCTATGTCTGG-3'    |
| mCks1b      | Forward | 5'-TATTTCGGACAAATACGACGACG-3'  |
|             | Reverse | 5'-GGTTCCTCCATTTCAGATTCAGAC-3' |
| mCks2       | Forward | 5'-TCGATGAGCACTACGAGTACC-3'    |
|             | Reverse | 5'-CCATCCTAGACTCTGTTGGACAC-3'  |
| mRprm       | Forward | 5'-GTGTGGTGCAGATCGCAGT-3'      |
|             | Reverse | 5'-ATCATGCCTTCGGACTTGATG-3'    |
| mTop2a      | Forward | 5'-CAACTGGAACATATACTGCTCCG-3'  |
|             | Reverse | 5'-GGGTCCCTTTGTTTGTATCAGC-3'   |
| mCcna2      | Forward | 5'-GCAGTTTTGAATCACCACATGC-3'   |
|             | Reverse | 5'-TGGCTGCCTCTTCATGTAACC-3'    |
| mBmp2       | Forward | 5'-AGATCTGTACCGCAGGCACT-3'     |
|             | Reverse | 5'-CGTCACTGGGGACAGAACTT-3'     |
| m18s        | Forward | 5'-GTAACCCGTTGAACCCATT-3'      |
|             | Reverse | 5'-CCATCCAATCGGTAGTAGCG-3'     |
| mFkbp5      |         | Mm00487401                     |
| mI13ra2     |         | Mm00515166                     |
| mCited2     |         | Mm00516121                     |
| m18s        |         | 4319413E                       |
