# Supplementary material
Source: PubMed Central journal article supplement (PMC4461536)
Supplement: NIHMS689999-supplement-3.pdf [file NIHMS689999-supplement-3.pdf]

Supplementary Table 3. Pathways differentially regulated by ablation of *Mig-6*

| Term                                                  | Molecules                                                                                                       | P-value  |
|-------------------------------------------------------|-----------------------------------------------------------------------------------------------------------------|----------|
| Cell Cycle: G2/M DNA Damage Checkpoint Regulation     | CKS2,CKS1B, TOP2A,CCNB2,RPRM,CDK1, CHEK1                                                                        | 6.03E-04 |
| Estrogen-mediated S-phase Entry                       | CCNA2,RBL1,E2F3,CCND1,CDK1                                                                                      | 1.05E-03 |
| Cell Cycle Control of Chromosomal Replication         | MCM5,MCM3,MCM6,MCM2,MCM4                                                                                        | 1.82E-03 |
| LPS/IL-1 Mediated Inhibition of RXR Function          | GSTA3,ABCB1,APOE,HMGCS2,IL33,GSTT1, HS6ST1,MAOB,JUN,null,ACSL5,SULT1C2, ACSL4,FABP4,SLC27A3,ABCC3               | 2.63E-03 |
| GADD45 Signaling                                      | PCNA,CCND2,CCND1,CDK1                                                                                           | 3.24E-03 |
| Pantothenate and CoA Biosynthesis                     | PANK1,ENPP3,BCAT1,DPYD                                                                                          | 3.24E-03 |
| ILK Signaling                                         | MUC1,CASP3,MYH14,VIM,RHOJ,PDGFC, CCND1,JUN,null,PPP2R2B,PPP1R12A,FIGF, IRS2,DSP                                 | 3.89E-03 |
| Tight Junction Signaling                              | CLDN10,TIAM1,CLDN23,JUN,CLDN5,CRB3,null, MYH14,PPP2R2B,IGSF5,ARHGEF2,CLDN7                                      | 6.03E-03 |
| Atherosclerosis Signaling                             | IL33,ALOX15,APOE,LPL,CD36,S100A8,CCL11,PLA2G7,PDGFC,APOD                                                        | 6.31E-03 |
| Pancreatic Adenocarcinoma Signaling                   | NAPEPLD,JAK1,CYP2E1,TGFA,FIGF,E2F3, CCND1,PDGFC,null                                                            | 9.33E-03 |
| ATM Signaling                                         | JUN,SMC2,CCNB2,BID,CDK1,CHEK1                                                                                   | 1.17E-02 |
| p53 Signaling                                         | PCNA,JUN,CCND2,RPRM,CCND1,null,CHEK1,S ERPINE2                                                                  | 1.29E-02 |
| Eicosanoid Signaling                                  | PTGIS,ALOX15,PTGFR,PTGER3,ALOX5AP, PLA2G7                                                                       | 1.51E-02 |
| Granzyme B Signaling                                  | CASP3,BID,LMNB1                                                                                                 | 1.51E-02 |
| Mismatch Repair in Eukaryotes                         | PCNA,MSH6,FEN1                                                                                                  | 1.51E-02 |
| Cyclins and Cell Cycle Regulation                     | CCNA2,CCND2,PPP2R2B,CCNB2,E2F3, CCND1,CDK1                                                                      | 1.55E-02 |
| Reelin Signaling in Neurons                           | APOE,ARHGEF4,ARHGEF16,ARHGEF2, DAB1,VLDLR,FRK                                                                   | 1.66E-02 |
| Hepatic Fibrosis / Hepatic Stellate Cell Activation   | MET,CYP2E1,MYH14,TGFA,IGFBP3,FIGF, BAMBI,PDGFC,IFNAR1,TIMP2                                                     | 1.95E-02 |
| Molecular Mechanisms of Cancer                        | ARHGEF4,TCF4,null,JAK1,CASP3,CREBBP, PTCH1,RHOJ,RBL1,E2F3,CCND1,RAC3,CHEK1, CCND2,JUN,ARHGEF16,null,BID,ARHGEF2 | 2.04E-02 |
| Mitotic Roles of Polo-Like Kinase                     | KIF23,CDC20,PPP2R2B,CCNB2, Ccnb1/Gm5593,CDK1                                                                    | 2.29E-02 |
| Granzyme A Signaling                                  | HIST1H1C,CREBBP,APEX1                                                                                           | 2.45E-02 |
| Colorectal Cancer Metastasis Signaling                | TCF4,JAK1,CASP3,PTGER3,RHOJ,PDGFC, CCND1,null,JUN,WNT7A,MSH6,FIGF,MMP11, MMP12                                  | 3.02E-02 |
| Nitrogen Metabolism                                   | CA3,CA2,CA12,GLUL                                                                                               | 3.16E-02 |
| Role of CHK Proteins in Cell Cycle Checkpoint Control | PCNA,PPP2R2B,E2F3,CDK1,CHEK1                                                                                    | 3.47E-02 |
| Glutathione Metabolism                                | GSTA3,GSR,GSTT1,GPX3,ANPEP                                                                                      | 4.47E-02 |
| Amyotrophic Lateral Sclerosis Signaling               | null,CASP3,CASP1,GLUL,BID,FIGF,PDGFC                                                                            | 4.90E-02 |
| Biosynthesis of Steroids                              | FDPS,SQLE,CYP2E1                                                                                                | 5.01E-02 |
| Induction of Apoptosis by HIV1                        | SLC25A13,null,SLC25A6,CASP3,BID                                                                                 | 5.01E-02 |
| Role of BRCA1 in DNA Damage Response                  | MSH6,FANCC,RBL1,E2F3,CHEK1                                                                                      | 5.01E-02 |
| LXR/RXR Activation                                    | IL33,APOE,SCD,LPL,CD36,S100A8,ARG2, APOD                                                                        | 5.13E-02 |
| HIF1 $\alpha$ Signaling                               | JUN,CREBBP,FIGF,MMP11,MMP12,APEX1, PDGFC                                                                        | 5.62E-02 |

| Term                                                                  | Molecules                                                                     | P-value  |
|-----------------------------------------------------------------------|-------------------------------------------------------------------------------|----------|
| RhoGDI Signaling                                                      | ARHGEF4,ARHGEF16,CREBBP,RDX,PPP1R12A,RHOJ,GRIP1,ARHGEF2,CDH16,CDH13           | 6.92E-02 |
| Role of IL-17A in Psoriasis                                           | S100A9,S100A8                                                                 | 6.92E-02 |
| eNOS Signaling                                                        | CCNA2,AQP5,PRKG1,CHRNA4,CASP3,FIGF,AQP4,PDGFC                                 | 7.08E-02 |
| TNFR1 Signaling                                                       | null,JUN,CASP3,BID                                                            | 7.59E-02 |
| DNA Double-Strand Break Repair by Homologous Recombination            | LIG1,ATRX                                                                     | 7.76E-02 |
| Production of Nitric Oxide and Reactive Oxygen Species in Macrophages | APOE,JAK1,JUN,PPP2R2B,CREBBP,PPP1R12A,RHOJ,S100A8,ARG2,APOD                   | 7.76E-02 |
| Signaling by Rho Family GTPases                                       | STMN1,ARHGEF4,JUN,ARHGEF16,RDX,PPP1R12A,VIM,CDC42EP3,RHOJ,ARHGEF2,CDH16,CDH13 | 8.71E-02 |
| IL-8 Signaling                                                        | NAPEPLD,JUN,CCND2,ANGPT1,FIGF,RHOJ,CCND1,RAC3,PDGFC,TEK                       | 8.91E-02 |
| Urea Cycle and Metabolism of Amino Groups                             | null,ARG2,ASPA                                                                | 9.12E-02 |
| Pyrimidine Metabolism                                                 | TYMS,ENPP3,DUT,DPYD,ENTPD2,DCTPP1,RRM2,UNG                                    | 9.55E-02 |
| O-Glycan Biosynthesis                                                 | GCNT3,GALNT3,GALNT12                                                          | 9.77E-02 |
| Glioma Signaling                                                      | IGF2,RBL1,E2F3,CCND1,IGF2R,PDGFC                                              | 1.00E-01 |
| Inhibition of Angiogenesis by TSP1                                    | JUN,CASP3,CD36                                                                | 1.05E-01 |
| Interferon Signaling                                                  | OAS1,JAK1,IFNAR1                                                              | 1.05E-01 |
| TWEAK Signaling                                                       | null,CASP3,BID                                                                | 1.05E-01 |
| Methane Metabolism                                                    | CYP2E1,SHMT1                                                                  | 1.10E-01 |
| Cell Cycle Regulation by BTG Family Proteins                          | PPP2R2B,E2F3,CCND1                                                            | 1.12E-01 |
| Arachidonic Acid Metabolism                                           | PTGIS,GSTT1,ALOX15,GPX3,CYP2E1,PLA2G7,null                                    | 1.24E-01 |
| Nitric Oxide Signaling in the Cardiovascular System                   | PDE2A,PRKG1,FIGF,PRKG2,PDGFC                                                  | 1.26E-01 |
| Death Receptor Signaling                                              | null,CASP3,BID,TNFSF10                                                        | 1.36E-01 |
| Cell Cycle: G1/S Checkpoint Regulation                                | CCND2,RBL1,E2F3,CCND1                                                         | 1.42E-01 |
| Docosahexaenoic Acid (DHA) Signaling                                  | ALOX15,CASP3,BID                                                              | 1.42E-01 |
| Glutamate Metabolism                                                  | GSR,GLUL,GPT2                                                                 | 1.42E-01 |
| One Carbon Pool by Folate                                             | TYMS,SHMT1                                                                    | 1.44E-01 |
| Sertoli Cell-Sertoli Cell Junction Signaling                          | CLDN10,CLDN23,PRKG1,JUN,CLDN5,null,IGSF5,PRKG2,CLDN7                          | 1.45E-01 |
| Retinoic acid Mediated Apoptosis Signaling                            | CASP3,BID,TNFSF10,IFNAR1                                                      | 1.61E-01 |
| FXR/RXR Activation                                                    | IL33,APOE,FOXA2,CREBBP,VLDLR                                                  | 1.62E-01 |
| Riboflavin Metabolism                                                 | ENPP3,PTPRJ                                                                   | 1.67E-01 |
| Bladder Cancer Signaling                                              | FIGF,MMP11,MMP12,CCND1,PDGFC                                                  | 1.73E-01 |
| Neuregulin Signaling                                                  | DCN,GRB7,TGFA,ERBB3,ERRFI1                                                    | 1.73E-01 |
| Angiopietin Signaling                                                 | ANGPT1,GRB7,TEK,null                                                          | 1.74E-01 |
| Aryl Hydrocarbon Receptor Signaling                                   | GSTA3,GSTT1,CCNA2,JUN,CCND2,CCND1,CHEK1                                       | 1.77E-01 |
| Inositol Metabolism                                                   | ALDOC                                                                         | 1.85E-01 |
| Hereditary Breast Cancer Signaling                                    | CREBBP,MSH6,FANCC,CCND1,CDK1,CHEK1                                            | 1.90E-01 |
| Leukocyte Extravasation Signaling                                     | CLDN10,CLDN23,CLDN5,VAV3,RDX,MMP11,CLDN7,MMP12,TIMP2                          | 1.90E-01 |
| Type II Diabetes Mellitus Signaling                                   | ACSL5,ADIPOQ,CD36,ACSL4,IRS2,SLC27A3                                          | 1.90E-01 |
| Role of Oct4 in Mammalian Embryonic Stem Cell Pluripotency            | null,FOXA2,NR2F2                                                              | 1.91E-01 |

| Term                                                        | Molecules                                                                      | P-value  |
|-------------------------------------------------------------|--------------------------------------------------------------------------------|----------|
| Glycosphingolipid Biosynthesis - Neolactoseries             | GCNT3,FUT9                                                                     | 1.92E-01 |
| Role of JAK1, JAK2 and TYK2 in Interferon Signaling         | JAK1,IFNAR1                                                                    | 1.92E-01 |
| Role of Lipids/Lipid Rafts in the Pathogenesis of Influenza | FDPS,IFNAR1                                                                    | 1.92E-01 |
| Tumoricidal Function of Hepatic Natural Killer Cells        | CASP3,BID                                                                      | 1.92E-01 |
| IL-10 Signaling                                             | IL33,JAK1,JUN,ARG2                                                             | 1.94E-01 |
| PXR/RXR Activation                                          | ABCB1,SCD,HMGCS2,ABCC3                                                         | 1.94E-01 |
| Breast Cancer Regulation by Stathmin1                       | STMN1,ARHGEF4,ARHGEF16,PPP2R2B, RB1CC1,PPP1R12A,ARHGEF2,E2F3,CDK1              | 1.97E-01 |
| Wnt/ $\beta$ -catenin Signaling                             | SOX7,SFRP4,TCF4,JUN,WNT7A,PPP2R2B, CREBBP,CCND1                                | 2.04E-01 |
| Renal Cell Carcinoma Signaling                              | MET,JUN,CREBBP,TGFA                                                            | 2.08E-01 |
| Histidine Metabolism                                        | MAOB,CYP2E1,ASPA                                                               | 2.26E-01 |
| IL-15 Production                                            | JAK1,FRK                                                                       | 2.29E-01 |
| N-Glycan Degradation                                        | FUCA2,MAN1A1                                                                   | 2.29E-01 |
| Aminosugars Metabolism                                      | PDE2A,PTPRJ,APEX1,NPL                                                          | 2.30E-01 |
| Ephrin B Signaling                                          | EFNB2,VAV3,ITSN2,RAC3                                                          | 2.30E-01 |
| Glycine, Serine and Threonine Metabolism                    | PSAT1,MAOB,CHDH,SHMT1                                                          | 2.30E-01 |
| IGF-1 Signaling                                             | JAK1,JUN,IGFBP3,IRS2,null                                                      | 2.33E-01 |
| Xenobiotic Metabolism Signaling                             | GSTA3,GSTT1,HS6ST1,ABCB1,MAOB, SULT1C2,PPP2R2B,MAF,CREBBP,UGT2B10, GRIP1,ABCC3 | 2.40E-01 |
| CD27 Signaling in Lymphocytes                               | JUN,CASP3,BID                                                                  | 2.44E-01 |
| Dopamine Receptor Signaling                                 | MAOB,PPP2R2B,PPP1R12A,PCBD1                                                    | 2.51E-01 |
| NRF2-mediated Oxidative Stress Response                     | GSTA3,GSR,GSTT1,JUN,MAF,CREBBP,ENC1,B ACH1                                     | 2.54E-01 |
| Semaphorin Signaling in Neurons                             | MET,SEMA4D,RHOJ                                                                | 2.54E-01 |
| Sonic Hedgehog Signaling                                    | PTCH1,CDK1                                                                     | 2.54E-01 |
| TNFR2 Signaling                                             | null,JUN                                                                       | 2.54E-01 |
| Primary Immunodeficiency Signaling                          | BLNK,IGHM,UNG                                                                  | 2.62E-01 |
| Fatty Acid Biosynthesis                                     | SLC27A3                                                                        | 2.65E-01 |
| Pentose Phosphate Pathway                                   | DERA,ALDOC                                                                     | 2.67E-01 |
| AMPK Signaling                                              | null,CHRNA4,PPP2R2B,ADIPOQ,ADRA2C, IRS2                                        | 2.83E-01 |
| Cardiac $\beta$ -adrenergic Signaling                       | AKAP13,PDE2A,null,PPP2R2B,PPP1R12A, APEX1                                      | 2.83E-01 |
| Ovarian Cancer Signaling                                    | TCF4,WNT7A,MSH6,FIGF,CCND1,PDGFC                                               | 2.83E-01 |
| IL-12 Signaling and Production in Macrophages               | ALOX15,APOE,JUN,MAF,S100A8,APOD                                                | 2.89E-01 |
| ErbB2-ErbB3 Signaling                                       | JUN,ERBB3,CCND1                                                                | 2.90E-01 |
| Glutamate Receptor Signaling                                | SLC1A3,GLUL,GRIP1                                                              | 2.99E-01 |
| Actin Cytoskeleton Signaling                                | TIAM1,IQGAP2,ARHGEF4,VAV3,MYH14,RDX,PP P1R12A,RAC3,PDGFC                       | 3.01E-01 |
| Serotonin Receptor Signaling                                | MAOB,PCBD1                                                                     | 3.04E-01 |
| Valine, Leucine and Isoleucine Biosynthesis                 | BCAT1                                                                          | 3.13E-01 |
| IL-9 Signaling                                              | JAK1,IRS2                                                                      | 3.17E-01 |
| Role of JAK2 in Hormone-like Cytokine Signaling             | JAK1,IRS2                                                                      | 3.17E-01 |

| Term                                                         | Molecules                                                        | P-value  |
|--------------------------------------------------------------|------------------------------------------------------------------|----------|
| Synthesis and Degradation of Ketone Bodies                   | HMGCS2                                                           | 3.37E-01 |
| ERK5 Signaling                                               | CTF1,MEF2C,WNK1                                                  | 3.45E-01 |
| Role of JAK1 and JAK3 in $\gamma$ c Cytokine Signaling       | BLNK,JAK1,IRS2                                                   | 3.45E-01 |
| Apoptosis Signaling                                          | null,CASP3,BID,CDK1                                              | 3.50E-01 |
| Activation of IRF by Cytosolic Pattern Recognition Receptors | JUN,CREBBP,IFNAR1                                                | 3.55E-01 |
| G $\alpha$ 12/13 Signaling                                   | JUN,VAV3,MEF2C,CDH16,CDH13                                       | 3.63E-01 |
| Notch Signaling                                              | CNTN1,HEY1                                                       | 3.66E-01 |
| Phenylalanine Metabolism                                     | MAOB,CYP2E1                                                      | 3.66E-01 |
| CTLA4 Signaling in Cytotoxic T Lymphocytes                   | AP1M2,PPP2R2B,AP1S3,PTPN22                                       | 3.72E-01 |
| Phospholipase C Signaling                                    | BLNK,NAPEPLD,ARHGEF4,ARHGEF16,CREBBP,PPP1R12A,RHOJ,MEF2C,ARHGEF2 | 3.72E-01 |
| Valine, Leucine and Isoleucine Degradation                   | BCAT1,HMGCS2,Aox3                                                | 3.73E-01 |
| Alanine and Aspartate Metabolism                             | GPT2,ASPA                                                        | 3.78E-01 |
| Chronic Myeloid Leukemia Signaling                           | RBL1,E2F3,CCND1,null                                             | 3.80E-01 |
| Calcium Signaling                                            | CHRNA4,TNNI2,ATP2B1,MYH14,CREBBP,MEF2C,ATP2B2                    | 3.84E-01 |
| Glioblastoma Multiforme Signaling                            | IGF2,WNT7A,RHOJ,E2F3,CCND1,PDGFC                                 | 3.90E-01 |
| Mechanisms of Viral Exit from Host Cells                     | LMNB1,null                                                       | 3.90E-01 |
| Netrin Signaling                                             | PRKG1,RAC3                                                       | 3.90E-01 |
| Role of PKR in Interferon Induction and Antiviral Response   | CASP3,BID                                                        | 3.90E-01 |
| Thyroid Cancer Signaling                                     | TCF4,CCND1                                                       | 3.90E-01 |
| Starch and Sucrose Metabolism                                | ENPP3,UGT2B10,AMY2A                                              | 3.92E-01 |
| Mouse Embryonic Stem Cell Pluripotency                       | ID1,TCF4,JAK1,CREBBP                                             | 3.95E-01 |
| PPAR Signaling                                               | IL33,JUN,CREBBP,PDGFC                                            | 3.95E-01 |
| Agrin Interactions at Neuromuscular Junction                 | JUN,ERBB3,RAC3                                                   | 4.01E-01 |
| Chemokine Signaling                                          | JUN,PPP1R12A,CCL11                                               | 4.09E-01 |
| Basal Cell Carcinoma Signaling                               | TCF4,WNT7A,PTCH1                                                 | 4.19E-01 |
| Extrinsic Prothrombin Activation Pathway                     | F5                                                               | 4.21E-01 |
| Parkinson's Signaling                                        | CASP3                                                            | 4.21E-01 |
| cAMP-mediated signaling                                      | null,AKAP13,PDE2A,RGS2,null,PTGER3,ADRA2C,APEX1                  | 4.24E-01 |
| HGF Signaling                                                | MET,ELF3,JUN,CCND1                                               | 4.26E-01 |
| $\beta$ -alanine Metabolism                                  | null,DPYD                                                        | 4.26E-01 |
| PDGF Signaling                                               | JAK1,JUN,PDGFC                                                   | 4.28E-01 |
| Small Cell Lung Cancer Signaling                             | CKS1B,BID,CCND1                                                  | 4.28E-01 |
| IL-17 Signaling                                              | JAK1,JUN,CCL11                                                   | 4.37E-01 |
| iNOS Signaling                                               | JAK1,JUN                                                         | 4.38E-01 |
| Cholecystinin/Gastrin-mediated Signaling                     | IL33,JUN,RHOJ,MEF2C                                              | 4.41E-01 |
| Cyanoamino Acid Metabolism                                   | SHMT1                                                            | 4.41E-01 |
| Phenylalanine, Tyrosine and Tryptophan Biosynthesis          | PCBD1                                                            | 4.41E-01 |
| RAN Signaling                                                | KPNA2                                                            | 4.41E-01 |
| Tryptophan Metabolism                                        | MAOB,CYP2E1,INMT,null,Aox3                                       | 4.44E-01 |
| Arginine and Proline Metabolism                              | null,MAOB,ARG2                                                   | 4.46E-01 |
| Tyrosine Metabolism                                          | MAOB,CYP2E1,Aox3                                                 | 4.46E-01 |
| Nicotinate and Nicotinamide Metabolism                       | ENPP3,PTPRJ,CDK1,Aox3                                            | 4.49E-01 |
| PI3K Signaling in B Lymphocytes                              | BLNK,JUN,ATF5,VAV3,IRS2                                          | 4.50E-01 |

| Term                                                                      | Molecules                                  | P-value  |
|---------------------------------------------------------------------------|--------------------------------------------|----------|
| Role of Osteoblasts, Osteoclasts and Chondrocytes in Rheumatoid Arthritis | IL33,SFRP4,null,TCF4,JUN,WNT7A,DLX5,IL18R1 | 4.50E-01 |
| Endoplasmic Reticulum Stress Pathway                                      | CASP3                                      | 4.59E-01 |
| EGF Signaling                                                             | JAK1,JUN                                   | 4.60E-01 |
| Retinol Metabolism                                                        | RDH10,UGT2B10                              | 4.71E-01 |
| Cellular Effects of Sildenafil (Viagra)                                   | PDE2A,PRKG1,MYH14,PPP1R12A,PRKG2           | 4.75E-01 |
| Linoleic Acid Metabolism                                                  | ALOX15,CYP2E1,PLA2G7                       | 4.89E-01 |
| Role of Wnt/GSK-3 $\beta$ Signaling in the Pathogenesis of Influenza      | TCF4,WNT7A,IFNAR1                          | 4.89E-01 |
| Stilbene, Coumarine and Lignin Biosynthesis                               | CYP2E1                                     | 4.95E-01 |
| Hepatic Cholestasis                                                       | IL33,ABCB1,JUN,SLCO3A1,ABCC3               | 5.01E-01 |
| PPAR $\alpha$ /RXR $\alpha$ Activation                                    | JUN,LPL,CREBBP,ADIPOQ,CD36,MED24           | 5.08E-01 |
| Androgen Signaling                                                        | JUN,AR,CREBBP,CCND1                        | 5.14E-01 |
| Prostate Cancer Signaling                                                 | AR,CREBBP,CCND1                            | 5.14E-01 |
| RhoA Signaling                                                            | RHPN2,RDX,PPP1R12A,CDC42EP3                | 5.14E-01 |
| PTEN Signaling                                                            | CASP3,CCND1,IGF2R,RAC3                     | 5.21E-01 |
| Sphingosine-1-phosphate Signaling                                         | CASP3,CASP1,RHOJ,PDGFC                     | 5.21E-01 |
| Maturity Onset Diabetes of Young (MODY) Signaling                         | FOXA2                                      | 5.28E-01 |
| Polyamine Regulation in Colon Cancer                                      | TCF4                                       | 5.28E-01 |
| Chondroitin Sulfate Biosynthesis                                          | HS6ST1,SULT1C2                             | 5.35E-01 |
| Cysteine Metabolism                                                       | HS6ST1,SULT1C2                             | 5.35E-01 |
| IL-2 Signaling                                                            | JAK1,JUN                                   | 5.35E-01 |
| Metabolism of Xenobiotics by Cytochrome P450                              | GSTA3,GSTT1,CYP2E1,UGT2B10                 | 5.36E-01 |
| Regulation of Actin-based Motility by Rho                                 | PPP1R12A,RHOJ,RAC3                         | 5.40E-01 |
| Lymphotoxin $\beta$ Receptor Signaling                                    | CASP3,CREBBP                               | 5.46E-01 |
| ErbB Signaling                                                            | JUN,TGFA,ERBB3                             | 5.47E-01 |
| Fructose and Mannose Metabolism                                           | PTPRJ,ALDOC                                | 5.56E-01 |
| Keratan Sulfate Biosynthesis                                              | HS6ST1,SULT1C2                             | 5.56E-01 |
| Propanoate Metabolism                                                     | ACSS1,SLC27A3                              | 5.56E-01 |
| Thrombopoietin Signaling                                                  | JUN,IRS2                                   | 5.56E-01 |
| Glycosphingolipid Biosynthesis - Globoseries                              | FUT9                                       | 5.60E-01 |
| IL-22 Signaling                                                           | JAK1                                       | 5.60E-01 |
| Phospholipid Degradation                                                  | NAPEPLD,PPAP2C,PLA2G7                      | 5.62E-01 |
| Actin Nucleation by ARP-WASP Complex                                      | PPP1R12A,RHOJ                              | 5.65E-01 |
| Glioma Invasiveness Signaling                                             | RHOJ,TIMP2                                 | 5.74E-01 |
| IL-17A Signaling in Gastric Cells                                         | JUN                                        | 5.74E-01 |
| Role of JAK family kinases in IL-6-type Cytokine Signaling                | JAK1                                       | 5.74E-01 |
| Antiproliferative Role of TOB in T Cell Signaling                         | CCNA2                                      | 5.89E-01 |
| Myc Mediated Apoptosis Signaling                                          | CASP3,BID                                  | 5.94E-01 |
| TREM1 Signaling                                                           | CASP1,CD83                                 | 5.94E-01 |
| Intrinsic Prothrombin Activation Pathway                                  | F5                                         | 6.15E-01 |
| Citrate Cycle                                                             | IDH3A                                      | 6.28E-01 |
| Methionine Metabolism                                                     | null                                       | 6.28E-01 |
