# Supplementary material
Source: PubMed Central journal article supplement (PMC4461536)
Supplement: NIHMS689999-supplement-4.pdf [file NIHMS689999-supplement-4.pdf]

Supplementary Table 4. List of regulated genes by P4 response and by *Mig-6* ablation in P4 response

| Name                                                                                | Symbol        | Accession No. | Probe set    | P4   | Mig-6 |
|-------------------------------------------------------------------------------------|---------------|---------------|--------------|------|-------|
| <b>a. Induced genes by P4 but suppressed genes by <i>Mig-6</i></b>                  |               |               |              |      |       |
| alcohol dehydrogenase 6A (class V)                                                  | Adh6a         | AK007397      | 1429608_at   | 4.77 | -2.88 |
| low density lipoprotein receptor-related protein 2                                  | Lrp2          | C80829        | 1452320_at   | 4.95 | -1.89 |
| galactose mutarotase                                                                | Galm          | AV307219      | 1452583_s_at | 2.25 | -1.83 |
| stromal cell-derived factor 2-like 1                                                | Sdf2l1        | NM_022324     | 1418206_at   | 1.47 | -1.75 |
| low density lipoprotein receptor-related protein 2                                  | Lrp2          | C80829        | 1427133_s_at | 3.97 | -1.73 |
| UDP-GlcNAc                                                                          | B3gnt5        | BM214359      | 1420994_at   | 2.49 | -1.70 |
| claudin 4                                                                           | Cldn4         | NM_009903     | 1418283_at   | 1.63 | -1.69 |
| claudin 3                                                                           | Cldn3         | AW611462      | 1434651_a_at | 2.19 | -1.67 |
| claudin 3                                                                           | Cldn3         | AF087821      | 1426332_a_at | 2.20 | -1.63 |
| claudin 3                                                                           | Cldn3         | BC012650      | 1451701_x_at | 2.20 | -1.63 |
| expressed sequence AU042651                                                         | AU042651      | AU042494      | 1440199_at   | 1.58 | -1.61 |
| actin, alpha 1, skeletal muscle                                                     | Acta1         | M12233        | 1427735_a_at | 2.07 | -1.60 |
| claudin 3                                                                           | Cldn3         | AW611462      | 1460569_x_at | 2.23 | -1.59 |
| CD14 antigen                                                                        | Cd14          | NM_009841     | 1417268_at   | 1.50 | -1.58 |
| RIKEN cDNA 6330442E10 gene                                                          | 6330442E10Rik | AV328515      | 1454632_at   | 1.51 | -1.56 |
| zinc metalloproteinase, STE24 homolog ( <i>S. cerevisiae</i> )                      | Zmpste24      | BM233793      | 1427923_at   | 2.34 | -1.56 |
| cDNA sequence BC037703                                                              | BC037703      | AV231983      | 1455241_at   | 2.72 | -1.56 |
| arginase type II                                                                    | Arg2          | AV002218      | 1438841_s_at | 1.80 | -1.55 |
| transportin 1                                                                       | Tnpo1         | BM236809      | 1455043_at   | 1.85 | -1.55 |
| syntaxin 18                                                                         | Stx18         | AK007700      | 1429288_x_at | 2.23 | -1.55 |
| RIKEN cDNA 2610528J11 gene                                                          | 2610528J11Rik | AK012175      | 1450947_at   | 1.37 | -1.52 |
| arginase type II                                                                    | Arg2          | NM_009705     | 1418847_at   | 1.84 | -1.51 |
| syntaxin 18                                                                         | Stx18         | AK016910      | 1431295_a_at | 2.23 | -1.51 |
| solute carrier family 6 (neurotransmitter transporter), member 14                   | Slc6a14       | AF320226      | 1420503_at   | 3.84 | -1.51 |
| LIM domain only 7                                                                   | Lmo7          | BM231903      | 1455056_at   | 1.58 | -1.50 |
| GRAM domain containing 3                                                            | Gramd3        | AV259880      | 1428737_s_at | 2.13 | -1.50 |
| FXYD domain-containing ion transport regulator 4                                    | Fxyd4         | NM_033648     | 1418207_at   | 2.33 | -1.50 |
| ATPase, Na <sup>+</sup> /K <sup>+</sup> transporting, beta 1 polypeptide            | Atp1b1        | AV152334      | 1439036_a_at | 4.42 | -1.50 |
| 4HAUS augmin-like complex, subunit 8                                                | Haus8         | NM_029621     | 1418719_at   | 1.72 | -1.48 |
| family with sequence similarity 84, member A                                        | Fam84a        | BC002154      | 1425452_s_at | 1.72 | -1.47 |
| chloride channel 5                                                                  | Clcn5         | BB794830      | 1429400_at   | 2.05 | -1.47 |
| syntaxin 18                                                                         | Stx18         | AK016910      | 1453819_x_at | 2.08 | -1.47 |
| coronin, actin binding protein 2A                                                   | Coro2a        | AI316747      | 1452367_at   | 2.59 | -1.47 |
| PDZ and LIM domain 1 (elfin)                                                        | Pdlim1        | NM_016861     | 1416554_at   | 2.25 | -1.46 |
| insulin-like 6                                                                      | Insl6         | NM_013754     | 1418346_at   | 3.20 | -1.46 |
| choline dehydrogenase                                                               | Chdh          | BG072100      | 1455435_s_at | 1.62 | -1.45 |
| syntaxin 18                                                                         | Stx18         | AI788958      | 1435102_a_at | 1.96 | -1.44 |
| family with sequence similarity 55, member C                                        | Fam55c        | BB626288      | 1436941_at   | 2.28 | -1.44 |
| sphingomyelin synthase 2                                                            | Sgms2         | AK016659      | 1429029_at   | 3.30 | -1.44 |
| RIKEN cDNA 1110067D22 gene                                                          | 1110067D22Rik | BC019131      | 1424318_at   | 1.72 | -1.43 |
| histidine decarboxylase                                                             | Hdc           | AF109137      | 1451796_s_at | 2.79 | -1.43 |
| core 1 synthase, glycoprotein-N-acetylgalactosamine 3-beta-galactosyltransferase, 1 | C1galt1       | NM_052993     | 1450745_at   | 1.66 | -1.42 |
| expressed sequence AW011956                                                         | AW011956      | BF146656      | 1448067_at   | 2.09 | -1.41 |

|                                                                                                |               |           |              |      |       |
|------------------------------------------------------------------------------------------------|---------------|-----------|--------------|------|-------|
| ATPase, Na <sup>+</sup> /K <sup>+</sup> transporting, beta 1 polypeptide                       | Atp1b1        | NM_009721 | 1418453_a_at | 4.64 | -1.41 |
| transmembrane protease, serine 4                                                               | Tmprss4       | BC021368  | 1426302_at   | 1.62 | -1.40 |
| carbonic anhydrase 5b, mitochondrial                                                           | Car5b         | BE132973  | 1447928_at   | 2.04 | -1.40 |
| solute carrier family 22 (organic anion/cation transporter), member 15                         | Slc22a15      | BB017021  | 1444312_at   | 1.54 | -1.39 |
| transmembrane protein with EGF-like and two follistatin-like domains 1                         | Tmeff1        | BM114154  | 1426649_at   | 1.58 | -1.39 |
| solute carrier family 27 (fatty acid transporter), member 2                                    | Slc27a2       | BC013442  | 1416316_at   | 2.14 | -1.39 |
| nudix (nucleoside diphosphate linked moiety X)-type motif 19                                   | Nudt19        | AK008430  | 1432332_a_at | 1.66 | -1.38 |
| syntaxin 18                                                                                    | Stx18         | BC021362  | 1425011_x_at | 2.06 | -1.38 |
| plasma membrane proteolipid                                                                    | Plip          | BC024534  | 1448945_at   | 2.61 | -1.38 |
| peroxisomal biogenesis factor 11 alpha                                                         | Pex11a        | NM_011068 | 1419365_at   | 1.81 | -1.37 |
| G protein-coupled receptor 172B                                                                | Gpr172b       | BB251205  | 1454870_x_at | 1.42 | -1.36 |
| ecotropic viral integration site 1                                                             | Evi1          | AI647591  | 1438325_at   | 1.44 | -1.36 |
| nuclear distribution gene E homolog 1 (A nidulans)                                             | Nde1          | BQ032232  | 1435737_a_at | 1.58 | -1.36 |
| RIKEN cDNA 1600029D21 gene                                                                     | 1600029D21Rik | AK002767  | 1454254_s_at | 2.77 | -1.34 |
| myeloid differentiation primary response gene 88                                               | Myd88         | BC005591  | 1419272_at   | 3.15 | -1.33 |
| PDZK1 interacting protein 1                                                                    | Pdzk1ip1      | BC013542  | 1417689_a_at | 3.17 | -1.33 |
| StAR-related lipid transfer (START) domain containing 5                                        | Stard5        | BI076697  | 1450769_s_at | 1.86 | -1.32 |
| PTK2 protein tyrosine kinase 2 beta                                                            | Ptk2b         | AV026976  | 1434653_at   | 2.58 | -1.32 |
| glutathione S-transferase, mu 2                                                                | Gstm2         | NM_008183 | 1416411_at   | 3.17 | -1.32 |
| IKAROS family zinc finger 1                                                                    | Ikzf1         | AV317621  | 1436312_at   | 1.53 | -1.31 |
| TMEM9 domain family, member B                                                                  | Tmem9b        | NM_020050 | 1417874_at   | 1.86 | -1.31 |
| metallothionein 2                                                                              | Mt2           | AA796766  | 1428942_at   | 2.24 | -1.31 |
| solute carrier family 2 (facilitated glucose transporter), member 12                           | Slc2a12       | BB043465  | 1435911_s_at | 1.61 | -1.29 |
| metallothionein 1                                                                              | Mt1           | NM_013602 | 1422557_s_at | 2.26 | -1.29 |
| family with sequence similarity 43, member A                                                   | Fam43a        | BB008324  | 1426734_at   | 1.34 | -1.26 |
| <b>b. Mig-6 dependent induced genes by P4</b>                                                  |               |           |              |      |       |
| protein tyrosine phosphatase-like (proline instead of catalytic arginine), member b            | Ptplb         | NM_023587 | 1449342_at   | 2.67 | 1.30  |
| c-mer proto-oncogene tyrosine kinase                                                           | Mertk         | NM_008587 | 1422869_at   | 1.34 | 1.31  |
| G protein-coupled receptor 64                                                                  | Gpr64         | AV242919  | 1439795_at   | 1.86 | 1.33  |
| gamma-glutamyl cyclotransferase                                                                | Ggct          | AA673177  | 1435695_a_at | 3.01 | 1.33  |
| sideroflexin 2                                                                                 | Sfxn2         | NM_053196 | 1449853_at   | 1.47 | 1.34  |
| solute carrier family 20, member 1                                                             | Slc20a1       | NM_015747 | 1448568_a_at | 1.45 | 1.35  |
| protein kinase, AMP-activated, beta 2 non-catalytic subunit                                    | Prkab2        | AV223660  | 1435874_at   | 1.40 | 1.38  |
| sideroflexin 2                                                                                 | Sfxn2         | BG066686  | 1435896_at   | 1.46 | 1.39  |
| FK506 binding protein 5                                                                        | Fkbp5         | U16959    | 1416125_at   | 4.04 | 1.39  |
| zinc finger protein 385A                                                                       | Zfp385a       | NM_013866 | 1418865_at   | 1.45 | 1.40  |
| protein kinase, AMP-activated, beta 2 non-catalytic subunit                                    | Prkab2        | AV223660  | 1435875_at   | 1.43 | 1.41  |
| a disintegrin-like and metallopeptidase (reprolysin type) with thrombospondin type 1 motif, 15 | Adamts15      | AV228731  | 1427056_at   | 1.79 | 1.41  |
| ribosomal protein L41                                                                          | Rpl41         | BI694945  | 1454639_x_at | 1.83 | 1.41  |
| Guanine nucleotide binding protein (G protein), beta polypeptide 2 like 1 (Gnb2l1), mRNA       | Gnb2l1        | BM205434  | 1440120_at   | 1.49 | 1.42  |
| SPARC related modular calcium binding 1                                                        | Smoc1         | NM_022316 | 1448321_at   | 1.42 | 1.43  |

|                                                                                     |               |           |              |      |      |
|-------------------------------------------------------------------------------------|---------------|-----------|--------------|------|------|
| hydroxysteroid 11-beta dehydrogenase 2                                              | Hsd11b2       | BC014753  | 1416761_at   | 4.29 | 1.43 |
| RIKEN cDNA 2210411K19 gene                                                          | 2210411K19Rik | BI694945  | 1433530_at   | 1.87 | 1.46 |
| collagen, type XII, alpha 1                                                         | Col12a1       | BB114398  | 1434411_at   | 4.13 | 1.46 |
| protein tyrosine phosphatase-like (proline instead of catalytic arginine), member b | Ptplb         | BG067863  | 1437329_at   | 2.23 | 1.47 |
| interleukin 13 receptor, alpha 2                                                    | Il13ra2       | BC003723  | 1422177_at   | 3.85 | 1.47 |
| Cbp/p300-interacting transactivator, with Glu/Asp-rich carboxy-terminal domain, 2   | Cited2        | Y15163    | 1452207_at   | 1.52 | 1.48 |
| zinc finger, CCHC domain containing 3                                               | Zcchc3        | AV140894  | 1428402_at   | 1.54 | 1.51 |
| zinc finger and BTB domain containing 16                                            | Zbtb16        | Z47205    | 1427638_at   | 1.77 | 1.59 |
| placenta specific 9                                                                 | Plac9         | BB609699  | 1452590_a_at | 1.49 | 1.60 |
| family with sequence similarity 65, member B                                        | Fam65b        | BM242294  | 1460555_at   | 2.38 | 1.61 |
| Mm.34106.1                                                                          |               | AI467657  | 1442025_a_at | 3.29 | 1.75 |
| zinc finger and BTB domain containing 16                                            | Zbtb16        | AA419994  | 1419874_x_at | 3.19 | 1.78 |
| Mm.34106.1                                                                          |               | AI467657  | 1442026_at   | 2.51 | 1.79 |
| Mm.216326.1                                                                         |               | BB517076  | 1460125_at   | 2.05 | 1.89 |
| gene regulated by estrogen in breast cancer protein                                 | Greb1         | NM_015764 | 1419593_at   | 2.53 | 1.92 |
| prostate and testis expressed 4                                                     | Pate4         | NM_020264 | 1422515_at   | 4.98 | 1.92 |
| gene regulated by estrogen in breast cancer protein                                 | Greb1         | AV373997  | 1439568_at   | 2.77 | 1.97 |
|                                                                                     | Mm.63340.1    | BB161337  | 1458089_at   | 1.72 | 1.98 |
| zinc finger and BTB domain containing 16                                            | Zbtb16        | BQ174973  | 1439163_at   | 3.01 | 1.99 |
| ATPase, H <sup>+</sup> transporting, lysosomal V0 subunit D2                        | Atp6v0d2      | BB769890  | 1434798_at   | 1.99 | 2.09 |
| midline 1                                                                           | Mid1          | BG073178  | 1438239_at   | 3.94 | 2.10 |
| signal peptide, CUB domain, EGF-like 2                                              | Scube2        | BI133839  | 1453486_a_at | 3.89 | 2.18 |
| Mm.215361.1                                                                         |               | BB096051  | 1459338_at   | 1.71 | 2.66 |
| RIKEN cDNA 6030422H21 gene                                                          | 6030422H21Rik | AI098139  | 1441799_at   | 1.96 | 2.84 |

**c. Mig-6 dependent repressed genes by P4**

|                                                                          |         |           |              |       |       |
|--------------------------------------------------------------------------|---------|-----------|--------------|-------|-------|
| keratin 12                                                               | Krt12   | NM_010661 | 1419230_at   | -2.21 | -2.68 |
| lactotransferrin                                                         | Ltf     | NM_008522 | 1450009_at   | -3.65 | -2.64 |
| Mm.140276.1                                                              |         | AV076187  | 1436814_at   | -2.06 | -2.63 |
| Mm.140276.1                                                              |         | AV076187  | 1436815_x_at | -1.87 | -2.36 |
| calbindin 1                                                              | Calb1   | BB177770  | 1456934_at   | -2.89 | -2.24 |
| keratin 12                                                               | Krt12   | NM_010661 | 1419231_s_at | -2.00 | -2.20 |
| calbindin 1                                                              | Calb1   | BB246032  | 1417504_at   | -2.08 | -2.18 |
| S100 calcium binding protein G                                           | S100g   | NM_009789 | 1448964_at   | -2.21 | -2.15 |
| transmembrane protein 45b                                                | Tmem45b | BC026654  | 1424357_at   | -2.67 | -2.13 |
| chemokine (C-X-C motif) ligand 17                                        | Cxcl17  | BC024561  | 1451610_at   | -1.70 | -2.08 |
| aquaporin 5                                                              | Aqp5    | NM_009701 | 1418818_at   | -2.16 | -2.07 |
| immunoglobulin kappa chain variable 1 (V1)                               | Igk-V1  | U29768    | 1460423_x_at | -2.26 | -2.01 |
| solute carrier family 44, member 3                                       | Slc44a3 | BC025548  | 1425109_at   | -1.84 | -1.99 |
| aldo-keto reductase family 1, member C19                                 | Akr1c19 | BG073853  | 1455454_at   | -1.80 | -1.96 |
| synaptic vesicle glycoprotein 2 b                                        | Sv2b    | BQ175909  | 1434800_at   | -2.13 | -1.93 |
| alanyl (membrane) aminopeptidase                                         | Anpep   | NM_008486 | 1421424_a_at | -1.50 | -1.93 |
| solute carrier family 15 (H <sup>+</sup> /peptide transporter), member 2 | Slc15a2 | BB244383  | 1447808_s_at | -2.40 | -1.88 |
| dapper homolog 2, antagonist of beta-catenin (xenopus)                   | Dact2   | AV306847  | 1437929_at   | -1.60 | -1.83 |
| calbindin 1                                                              | Calb1   | BB246032  | 1448738_at   | -2.34 | -1.82 |

|                                                                                                         |           |           |              |       |       |
|---------------------------------------------------------------------------------------------------------|-----------|-----------|--------------|-------|-------|
| solute carrier family 15 (H <sup>+</sup> /peptide transporter), member 2                                | Slc15a2   | BC018335  | 1424730_a_at | -2.21 | -1.80 |
| solute carrier family 1 (neuronal/epithelial high affinity glutamate transporter, system Xag), member 1 | Slc1a1    | U75214    | 1425415_a_at | -1.49 | -1.77 |
| cytochrome b5 reductase 3                                                                               | Cyb5r3    | NM_029787 | 1422185_a_at | -1.49 | -1.73 |
| solute carrier family 1 (neuronal/epithelial high affinity glutamate transporter, system Xag), member 1 | Slc1a1    | NM_009199 | 1448299_at   | -1.57 | -1.72 |
| aspartoacylase                                                                                          | Aspa      | BC024934  | 1418472_at   | -1.91 | -1.70 |
| MARVEL (membrane-associating) domain containing 3                                                       | Marveld3  | AK007346  | 1453264_at   | -1.71 | -1.69 |
| desmocollin 2                                                                                           | Dsc2      | BC004663  | 1426911_at   | -1.64 | -1.69 |
| mucin 1, transmembrane                                                                                  | Muc1      | NM_013605 | 1449199_at   | -1.97 | -1.68 |
| E74-like factor 3                                                                                       | Elf3      | NM_007921 | 1416916_at   | -1.58 | -1.67 |
| aryl hydrocarbon receptor nuclear translocator 2                                                        | Arnt2     | BQ174321  | 1434028_at   | -2.28 | -1.64 |
| cytochrome b5 reductase 3                                                                               | Cyb5r3    | NM_029787 | 1422186_s_at | -1.47 | -1.64 |
| CD24a antigen                                                                                           | Cd24a     | NM_009846 | 1416034_at   | -1.58 | -1.62 |
| acid phosphatase, prostate                                                                              | Acpp      | BB008092  | 1441975_at   | -1.88 | -1.59 |
| epithelial stromal interaction 1 (breast)                                                               | Epsti1    | BF020640  | 1452087_at   | -1.92 | -1.58 |
| nuclear factor, erythroid derived 2, like 3                                                             | Nfe2l3    | NM_010903 | 1417520_at   | -1.81 | -1.58 |
| carbonic anhydrase 12                                                                                   | Car12     | AK009873  | 1428485_at   | -1.66 | -1.58 |
| heme binding protein 2                                                                                  | Hebp2     | NM_019487 | 1449271_a_at | -1.49 | -1.58 |
| glutathione peroxidase 2                                                                                | Gpx2      | NM_030677 | 1449279_at   | -1.48 | -1.58 |
| ankyrin repeat and SOCS box-containing 4                                                                | Asb4      | AV302111  | 1433919_at   | -1.68 | -1.57 |
| Rho guanine nucleotide exchange factor (GEF) 16                                                         | Arhgef16  | BB235768  | 1427386_at   | -1.48 | -1.57 |
| epithelial cell adhesion molecule                                                                       | Epcam     | BC005618  | 1416579_a_at | -1.47 | -1.57 |
| CD24a antigen                                                                                           | Cd24a     | NM_009846 | 1448182_a_at | -1.61 | -1.55 |
| interleukin 17 receptor E                                                                               | Il17re    | BG973910  | 1426566_s_at | -1.45 | -1.55 |
| hormonally upregulated Neu-associated kinase expressed sequence AU021092                                | AU021092  | BG069824  | 1437661_at   | -1.74 | -1.54 |
| cyclin D1                                                                                               | Ccnd1     | NM_007631 | 1417419_at   | -1.74 | -1.54 |
| glutathione S-transferase, alpha 4                                                                      | Gsta4     | NM_010357 | 1416368_at   | -1.37 | -1.54 |
| desmoplakin                                                                                             | Dsp       | AV297961  | 1435494_s_at | -1.62 | -1.52 |
| mannosidase, beta A, lysosomal                                                                          | Manba     | NM_027288 | 1450626_at   | -1.70 | -1.50 |
| lectin, galactose binding, soluble 3                                                                    | Lgals3    | X16834    | 1426808_at   | -1.67 | -1.50 |
| fucosyltransferase 9                                                                                    | Fut9      | AU067636  | 1435308_at   | -1.62 | -1.49 |
| caspase 1                                                                                               | Casp1     | BC008152  | 1449265_at   | -1.48 | -1.48 |
| B-cell linker                                                                                           | Blnk      | AF068182  | 1451780_at   | -2.08 | -1.47 |
| transforming growth factor, beta induced                                                                | Tgfb1     | NM_009369 | 1448123_s_at | -1.78 | -1.47 |
| integrin beta 4                                                                                         | Itgb4     | L04678    | 1427387_a_at | -1.67 | -1.47 |
| caspase 3                                                                                               | Casp3     | BG070529  | 1449839_at   | -1.64 | -1.47 |
| signal transducing adaptor family member 2                                                              | Stap2     | BC026642  | 1424148_a_at | -1.34 | -1.47 |
| proline rich 15                                                                                         | Prr15     | AJ132433  | 1452473_at   | -1.59 | -1.46 |
| cytochrome b5 reductase 3                                                                               | Cyb5r3    | AF332060  | 1425329_a_at | -1.53 | -1.46 |
| protein phosphatase 1, regulatory (inhibitor) subunit 3B                                                | Ppp1r3b   | BG071940  | 1436590_at   | -1.47 | -1.46 |
| erythrocyte protein band 4.1-like 4b                                                                    | Epb4.1l4b | NM_019427 | 1418294_at   | -1.42 | -1.45 |
| transforming growth factor, beta induced                                                                | Tgfb1     | BB532080  | 1437463_x_at | -1.79 | -1.44 |
| DIRAS family, GTP-binding RAS-like 2                                                                    | Diras2    | BM114282  | 1455436_at   | -1.41 | -1.44 |

|                                                             |               |           |              |       |       |
|-------------------------------------------------------------|---------------|-----------|--------------|-------|-------|
| ankyrin repeat domain 29                                    | Ankrd29       | AV370837  | 1438756_at   | -2.65 | -1.42 |
| sortilin-related receptor, LDLR class A repeats-containing  | Sorl1         | AK013519  | 1453003_at   | -2.01 | -1.42 |
| transforming growth factor, beta induced                    | Tgfbf1        | BB533460  | 1456250_x_at | -1.69 | -1.42 |
| potassium channel tetramerisation domain containing 14      | Kctd14        | AW552116  | 1455452_x_at | -1.58 | -1.42 |
| sortilin-related receptor, LDLR class A repeats-containing  | Sorl1         | BI648081  | 1426258_at   | -1.95 | -1.41 |
| prostaglandin reductase 1                                   | Ptgr1         | BC014865  | 1417777_at   | -1.60 | -1.41 |
| interferon induced transmembrane protein 1                  | Ifitm1        | BC027285  | 1424254_at   | -1.53 | -1.41 |
| heme binding protein 1                                      | Hebp1         | AF117613  | 1418172_at   | -1.34 | -1.41 |
| mitogen-activated protein kinase-activated protein kinase 3 | Mapkapk3      | AI451985  | 1434815_a_at | -1.63 | -1.38 |
| RIKEN cDNA 9930023K05 gene                                  | 9930023K05Rik | BC023093  | 1427521_a_at | -1.44 | -1.38 |
| Rho-guanine nucleotide exchange factor                      | Rgnef         | BG069493  | 1419457_at   | -1.60 | -1.37 |
| expressed sequence AU040829                                 | AU040829      | BB079908  | 1455144_s_at | -1.55 | -1.37 |
| coiled-coil-helix-coiled-coil-helix domain containing 10    | Chchd10       | AA038464  | 1436990_s_at | -1.54 | -1.37 |
| ring finger protein 24                                      | Rnf24         | BB752033  | 1436101_at   | -1.47 | -1.37 |
| ankyrin repeat domain 6                                     | Ankrd6        | BM225135  | 1437217_at   | -1.75 | -1.36 |
| RIKEN cDNA 0610040B09 gene                                  | 0610040B09Rik | AV302770  | 1447886_at   | -1.45 | -1.36 |
| paraoxonase 2                                               | Pon2          | NM_008896 | 1450686_at   | -1.40 | -1.36 |
| rhophilin, Rho GTPase binding protein 2                     | Rhpn2         | BF228009  | 1434628_a_at | -1.55 | -1.34 |
| carcinoembryonic antigen-related cell adhesion molecule 1   | Ceacam1       | NM_011926 | 1422123_s_at | -1.49 | -1.34 |
| ephrin B2                                                   | Efnb2         | U30244    | 1419638_at   | -1.80 | -1.32 |
| aldo-keto reductase family 1, member E1                     | Akr1e1        | BC012692  | 1417826_at   | -1.31 | -1.28 |

**d. Suppressed genes by P4 but induced genes by Mig-6**

|                                                                        |               |           |              |       |      |
|------------------------------------------------------------------------|---------------|-----------|--------------|-------|------|
| major urinary protein 1                                                | Mup1          | NM_031188 | 1420465_s_at | -5.24 | 2.86 |
| RIKEN cDNA 4833423F13 gene                                             | 4833423F13Rik | AW764291  | 1430622_at   | -1.74 | 2.08 |
| RIKEN cDNA 4930523C07 gene                                             | 4930523C07Rik | AV032877  | 1437900_at   | -1.51 | 1.33 |
| RIKEN cDNA 4930523C07 gene                                             | 4930523C07Rik | BM246687  | 1456446_at   | -1.55 | 2.74 |
| RIKEN cDNA 4930573O21 gene                                             | 4930573O21Rik | AW912387  | 1432590_at   | -1.69 | 1.99 |
| RIKEN cDNA 5330406M23 gene                                             | 5330406M23Rik | BM241296  | 1429900_at   | -1.58 | 2.52 |
| predicted gene, 545228                                                 | 545228        | AA175473  | 1435198_at   | -1.58 | 1.59 |
| RIKEN cDNA 9030425L15 gene                                             | 9030425L15Rik | BG797916  | 1429977_at   | -1.49 | 3.02 |
| RIKEN cDNA 9530009M10 gene                                             | 9530009M10Rik | BB469215  | 1445850_at   | -1.62 | 2.54 |
| RIKEN cDNA A130004G11 gene                                             | A130004G11Rik | BB203756  | 1444670_at   | -1.73 | 2.23 |
| RIKEN cDNA A330001L22 gene                                             | A330001L22Rik | BB183877  | 1444734_at   | -1.50 | 1.96 |
| RIKEN cDNA A630026N12 gene                                             | A630026N12Rik | BB125550  | 1436447_at   | -1.46 | 1.46 |
| RIKEN cDNA A630033E08 gene (A630033E08Rik), transcript variant 1, mRNA | A630033E08Rik | BB391874  | 1437127_at   | -1.65 | 2.03 |
| aminoadipate-semialdehyde dehydrogenase                                | Aasdh         | AI875121  | 1419824_a_at | -1.33 | 1.34 |
| acyl-Coenzyme A binding domain containing 4                            | Acbd4         | AI849317  | 1449626_s_at | -1.35 | 1.34 |
| expressed sequence AI480526                                            | AI480526      | BB432317  | 1435711_at   | -1.37 | 1.44 |
| expressed sequence AI956758                                            | AI956758      | AV234963  | 1460003_at   | -1.36 | 1.41 |
| annexin A7                                                             | Anxa7         | AV333182  | 1438764_at   | -1.38 | 1.64 |
| armadillo repeat containing, X-linked 1                                | Armxc1        | BC021410  | 1425914_a_at | -1.34 | 1.35 |
| ataxin 1                                                               | Atxn1         | BG067317  | 1438294_at   | -1.35 | 1.38 |
| RIKEN cDNA B930025B16 gene                                             | B930025B16Rik | BE648536  | 1458376_at   | -1.55 | 2.00 |
| cDNA sequence BC021381                                                 | BC021381      | BC021381  | 1451234_at   | -1.43 | 1.31 |

|                                                          |                                                                    |           |              |       |      |
|----------------------------------------------------------|--------------------------------------------------------------------|-----------|--------------|-------|------|
| cDNA sequence BC031353                                   | BC031353                                                           | BG276629  | 1436033_at   | -1.76 | 1.47 |
| cDNA sequence BC031353                                   | BC031353                                                           | BB369212  | 1439293_at   | -2.23 | 2.02 |
| B-cell leukemia/lymphoma 2                               | Bcl2                                                               | AI505544  | 1440770_at   | -1.52 | 2.91 |
| B-cell CLL/lymphoma 9                                    | Bcl9                                                               | AV173898  | 1455565_at   | -1.32 | 1.43 |
| B-cell translocation gene 1, anti-proliferative          | Btg1                                                               | BE632903  | 1442018_at   | -1.77 | 2.00 |
| RIKEN cDNA C030002C11 gene                               | C030002C11Rik                                                      | BF469399  | 1460033_at   | -1.51 | 2.03 |
| chromobox homolog 7                                      | Cbx7                                                               | AV024881  | 1433557_at   | -1.47 | 1.71 |
| cyclin-dependent kinase 6                                | Cdk6                                                               | BM238926  | 1435338_at   | -1.45 | 1.26 |
| cytoplasmic polyadenylation element binding protein 1    | Cpeb1                                                              | NM_007755 | 1417960_at   | -1.44 | 1.57 |
| cytochrome P450, family 2, subfamily d, polypeptide 22   | Cyp2d22                                                            | BF683039  | 1419040_at   | -1.45 | 1.44 |
| DNA segment, Chr 17, ERATO Doi 663, expressed            | D17Ertd663e                                                        | BB368203  | 1436627_at   | -1.65 | 1.63 |
| hypothetical protein D930001B02                          | D930001B02                                                         | BB311940  | 1442416_at   | -1.37 | 1.61 |
| decorin                                                  | Dcn                                                                | AV321547  | 1441506_at   | -3.00 | 2.31 |
| development and differentiation enhancing factor 2       | Ddef2                                                              | AV077160  | 1436181_at   | -1.42 | 1.28 |
| DEAD/H (Asp-Glu-Ala-Asp/His) box polypeptide 26B         | Ddx26b                                                             | BB460424  | 1426832_at   | -1.33 | 1.94 |
| DEAD/H (Asp-Glu-Ala-Asp/His) box polypeptide 26B         | Ddx26b                                                             | BM239943  | 1438496_a_at | -1.68 | 2.11 |
| dystrophin, muscular dystrophy                           | Dmd                                                                | BB515094  | 1443315_at   | -1.49 | 3.71 |
| dynamamin 3, opposite strand                             | Dnm3os                                                             | BB542096  | 1427298_at   | -1.46 | 1.96 |
| dynamamin 3, opposite strand                             | Dnm3os                                                             | BB542096  | 1452382_at   | -1.56 | 2.21 |
| predicted gene, ENSMUSG00000072593                       | ENSMUSG00000072593                                                 | AI875680  | 1436357_at   | -1.41 | 1.61 |
| family with sequence similarity 102, member B            | Fam102b                                                            | BB325849  | 1455033_at   | -1.32 | 1.37 |
| FCH domain only 2                                        | Fcho2                                                              | BM224404  | 1442453_at   | -1.49 | 1.69 |
| fibronectin 1                                            | <td>BM234360</td> <td>1437218_at</td> <td>-1.53</td> <td>1.56</td> | BM234360  | 1437218_at   | -1.53 | 1.56 |
| formin binding protein 1                                 | Fbnp1                                                              | AI606033  | 1453746_at   | -1.50 | 1.43 |
| Forkhead box P1 (Foxp1), mRNA                            | Foxp1                                                              | BB021390  | 1438802_at   | -1.51 | 2.19 |
| G-protein signalling modulator 1 (AGS3-like, C. elegans) | Gpsm1                                                              | BC026486  | 1423690_s_at | -1.40 | 1.39 |
| G-protein signalling modulator 1 (AGS3-like, C. elegans) | Gpsm1                                                              | BB491018  | 1436917_s_at | -1.40 | 1.54 |
| histone cluster 1, H1c                                   | Hist1h1c                                                           | BB533903  | 1436994_a_at | -1.57 | 1.54 |
| intraflagellar transport 81 homolog (Chlamydomonas)      | Ift81                                                              | NM_009879 | 1419286_s_at | -1.31 | 1.34 |
| LIM domain binding 2                                     | Ldb2                                                               | NM_010698 | 1421101_a_at | -1.36 | 1.34 |
| hypothetical LOC552901                                   | LOC552901                                                          | AW546414  | 1458505_at   | -1.64 | 3.07 |
| hypothetical LOC552908                                   | LOC552908                                                          | BB344065  | 1442213_at   | -1.58 | 1.99 |
| lon peptidase 2, peroxisomal                             | Lonp2                                                              | AV229709  | 1442258_at   | -1.47 | 1.95 |
| mitogen-activated protein kinase 1 interacting protein 1 | Mapk1ip1                                                           | AK009250  | 1452798_s_at | -1.46 | 1.45 |
| mbt domain containing 1                                  | Mbtd1                                                              | NM_134012 | 1448641_at   | -1.44 | 1.34 |
| Meis homeobox 2                                          | Meis2                                                              | U68384    | 1417129_a_at | -1.36 | 1.37 |
| Mm.104085.1                                              |                                                                    | BG084182  | 1448018_at   | -1.46 | 1.94 |
| Mm.110445.1                                              |                                                                    | AI746579  | 1447156_at   | -1.49 | 2.04 |
| Mm.131976.1                                              |                                                                    | BB310819  | 1442715_at   | -1.61 | 3.70 |
| Mm.132675.1                                              |                                                                    | BB082567  | 1460092_at   | -1.80 | 1.91 |
| Mm.132768.1                                              |                                                                    | BB472447  | 1458121_at   | -1.49 | 2.13 |

|                                                                             |         |           |              |       |      |
|-----------------------------------------------------------------------------|---------|-----------|--------------|-------|------|
| Mm.138292.1                                                                 |         | BM119433  | 1455418_at   | -1.51 | 1.35 |
| Mm.153754.1                                                                 |         | BM195033  | 1444746_at   | -1.45 | 2.61 |
| Mm.173929.1                                                                 |         | BG072274  | 1445781_at   | -1.62 | 2.43 |
| Mm.175790.1                                                                 |         | BG147662  | 1442785_at   | -1.56 | 2.43 |
| Mm.182592.1                                                                 |         | AW546127  | 1459301_at   | -1.63 | 2.80 |
| Mm.182879.1                                                                 |         | BG076280  | 1445963_at   | -1.61 | 2.68 |
| Mm.202445.1                                                                 |         | BM219178  | 1445600_at   | -1.60 | 1.99 |
| Mm.205603.1                                                                 |         | BM202580  | 1441425_at   | -1.64 | 2.25 |
| Mm.207362.2                                                                 |         | BI901592  | 1444543_at   | -1.82 | 2.65 |
| Mm.208071.1                                                                 |         | BB223800  | 1458746_at   | -1.52 | 2.42 |
| Mm.208929.1                                                                 |         | BB170718  | 1443270_at   | -1.46 | 2.05 |
| Mm.210065.1                                                                 |         | BB432268  | 1458213_at   | -1.37 | 2.23 |
| Mm.213227.1                                                                 |         | BB051952  | 1443018_at   | -1.85 | 2.08 |
| Mm.214924.1                                                                 |         | BM240022  | 1439301_at   | -1.87 | 3.18 |
| Mm.214945.1                                                                 |         | BM114572  | 1441544_at   | -1.73 | 1.92 |
| Mm.215277.1                                                                 |         | BM238838  | 1440587_at   | -1.54 | 2.62 |
| Mm.215558.1                                                                 |         | BM120546  | 1459219_at   | -1.56 | 1.96 |
| Mm.216012.1                                                                 |         | BB472891  | 1446280_at   | -1.45 | 1.89 |
| Mm.216090.1                                                                 |         | BB520404  | 1446138_at   | -1.39 | 2.12 |
| Mm.216304.1                                                                 |         | BM123510  | 1445664_at   | -1.71 | 2.38 |
| Mm.218500.1                                                                 |         | AV319481  | 1459238_at   | -1.50 | 2.56 |
| Mm.24297.1                                                                  |         | BM119756  | 1439136_at   | -1.39 | 1.68 |
| Mm.25061.1                                                                  |         | BB220625  | 1443996_at   | -1.38 | 1.60 |
| Mm.34195.1                                                                  |         | BG071024  | 1439537_at   | -1.55 | 2.64 |
| Mm.37808.1                                                                  |         | BE685667  | 1437584_at   | -2.17 | 1.96 |
| Mm.37916.1                                                                  |         | BB386165  | 1444195_at   | -1.57 | 1.96 |
| Mm.38079.1                                                                  |         | BB667435  | 1443027_at   | -1.46 | 2.99 |
| Mm.38206.1                                                                  |         | AU040352  | 1459695_at   | -1.55 | 2.83 |
| Mm.4025.5                                                                   |         | BI664122  | 1438245_at   | -1.36 | 2.14 |
| Mm.74627.1                                                                  |         | BB524346  | 1440273_at   | -1.73 | 1.71 |
| Mm.87267.1                                                                  |         | AW553541  | 1437219_at   | -1.60 | 1.88 |
| neural cell adhesion molecule 1                                             | Ncam1   | BM201198  | 1439556_at   | -1.63 | 2.52 |
| nuclear receptor coactivator 2                                              | Ncoa2   | BB472900  | 1446827_at   | -1.53 | 1.77 |
| Nuclear factor of activated T-cells 5 (Nfat5), transcript variant a, mRNA   | Nfat5   | BB488160  | 1439805_at   | -1.49 | 2.02 |
| neuropilin 2                                                                | Nrp2    | BQ176723  | 1426528_at   | -1.46 | 1.48 |
| O-linked N-acetylglucosamine (GlcNAc) transferase (UDP-N-acetylglucosamine) | Ogt     | AF363030  | 1425517_s_at | -1.47 | 1.60 |
| O-linked N-acetylglucosamine (GlcNAc) transferase (UDP-N-acetylglucosamine) | Ogt     | BF681886  | 1460631_at   | -1.45 | 1.71 |
| purinergic receptor P2X, ligand-gated ion channel, 7                        | P2rx7   | BM124050  | 1439787_at   | -1.52 | 1.35 |
| period homolog 3 (Drosophila)                                               | Per3    | NM_011067 | 1421087_at   | -1.62 | 1.59 |
| Period homolog 3 (Drosophila) (Per3), mRNA                                  | Per3    | BB021263  | 1458176_at   | -1.75 | 2.01 |
| pleckstrin homology domain interacting protein                              | Phip    | BB523030  | 1438535_at   | -1.37 | 1.97 |
| pleckstrin homology-like domain, family B, member 2                         | Phldb2  | AV253284  | 1454862_at   | -1.28 | 1.36 |
| proviral integration site 1                                                 | Pim1    | AI323550  | 1435458_at   | -1.54 | 1.40 |
| phospholipid scramblase 4                                                   | Plscr4  | BB826296  | 1433626_at   | -1.49 | 1.43 |
| protein phosphatase 1, regulatory (inhibitor) subunit 9A                    | Ppp1r9a | BF472950  | 1440285_at   | -1.28 | 1.35 |

|                                                                                                   |          |           |              |       |      |
|---------------------------------------------------------------------------------------------------|----------|-----------|--------------|-------|------|
| protein phosphatase 1, regulatory (inhibitor) subunit 9A                                          | Ppp1r9a  | AU067663  | 1456072_at   | -1.32 | 1.40 |
| RNA binding motif protein 24                                                                      | Rbm24    | AW125876  | 1458624_at   | -1.69 | 1.41 |
| RNA binding motif protein 5                                                                       | Rbm5     | BE446879  | 1438069_a_at | -1.63 | 1.76 |
| RNA binding motif protein 5                                                                       | Rbm5     | BE446879  | 1456262_at   | -1.64 | 1.89 |
| RNA binding protein gene with multiple splicing, mRNA (cDNA clone MGC)                            | Rbpms    | BM235590  | 1444765_at   | -1.46 | 2.64 |
| Ras homolog enriched in brain like 1                                                              | Rhebl1   | AV271831  | 1447818_x_at | -1.65 | 1.49 |
| R-spondin 3 homolog ( <i>Xenopus laevis</i> )                                                     | Rspo3    | BG072958  | 1455607_at   | -1.45 | 1.39 |
| splicing factor, arginine/serine-rich 18                                                          | Sfrs18   | BB767442  | 1435080_x_at | -1.28 | 1.64 |
| splicing factor, arginine/serine-rich 18                                                          | Sfrs18   | BG277020  | 1429537_at   | -1.56 | 1.67 |
| solute carrier family 12, member 6                                                                | Slc12a6  | NM_133648 | 1449878_a_at | -1.68 | 1.46 |
| Solute carrier family 25, member 27 (Slc25a27), nuclear gene encoding mitochondrial protein, mRNA | Slc25a27 | BB475037  | 1440090_at   | -1.89 | 1.79 |
| sushi, nidogen and EGF-like domains 1                                                             | Sned1    | BB487754  | 1435603_at   | -1.60 | 1.36 |
| SRY-box containing gene 4                                                                         | Sox4     | AI428101  | 1419155_a_at | -1.40 | 1.35 |
| SRY-box containing gene 4                                                                         | Sox4     | AI428101  | 1419156_at   | -1.35 | 1.40 |
| START domain containing 9                                                                         | Stard9   | BB427728  | 1436324_at   | -1.45 | 1.39 |
| transcription factor 25 (basic helix-loop-helix)                                                  | Tcf25    | BE988778  | 1437205_at   | -1.43 | 1.28 |
| trinucleotide repeat containing 6b                                                                | Tnrc6b   | BB313187  | 1460024_at   | -1.41 | 1.33 |
| tripartite motif-containing 45                                                                    | Trim45   | BG965876  | 1441412_s_at | -1.48 | 1.55 |
| triple functional domain (PTPRF interacting)                                                      | Trio     | BB080177  | 1454711_at   | -1.32 | 1.35 |
| triple functional domain (PTPRF interacting)                                                      | Trio     | BB080177  | 1433745_at   | -1.31 | 1.55 |
| tetratricopeptide repeat domain 3                                                                 | Ttc3     | BB833716  | 1416483_at   | -1.40 | 1.40 |
| tetratricopeptide repeat domain 3                                                                 | Ttc3     | BB466388  | 1460077_at   | -1.44 | 2.38 |
| ubiquitin-conjugating enzyme E2B, RAD6 homology ( <i>S. cerevisiae</i> )                          | Ube2b    | BB047737  | 1439477_at   | -1.51 | 1.79 |
| vacuolar protein sorting 41 (yeast)                                                               | Vps41    | BM240052  | 1437901_a_at | -1.48 | 1.87 |
| Zinc finger protein 799, mRNA (cDNA clone MGC)                                                    | Zfp799   | BB453760  | 1436592_at   | -1.33 | 1.47 |
| zinc finger, matrin type 1                                                                        | Zmat1    | BM242273  | 1435829_at   | -1.39 | 1.63 |
